# Supplementary material for: Biomimetic Gradient Scaffolds Containing Hyaluronic Acid and Sr/Zn Folates for Osteochondral Tissue Engineering
Source: MDPI journal article supplement (doi:10.3390/polym14010012), 2021-12-21
Supplement: s1 [file s1]

# Biomimetic Gradient Scaffolds Containing Hyaluronic Acid and Sr/Zn Folates for Osteochondral Tissue Engineering

Gerardo Asensio, Lorena Benito-Garzón, Rosa Ana Ramírez, Yasmina Guadilla, J. González-Rubio, Cristina Abradelo, Juan Parra, Rocío Martín-López, María Rosa Aguilar, Blanca Vázquez-Lasa and Luis Rojo

## Supplementary data

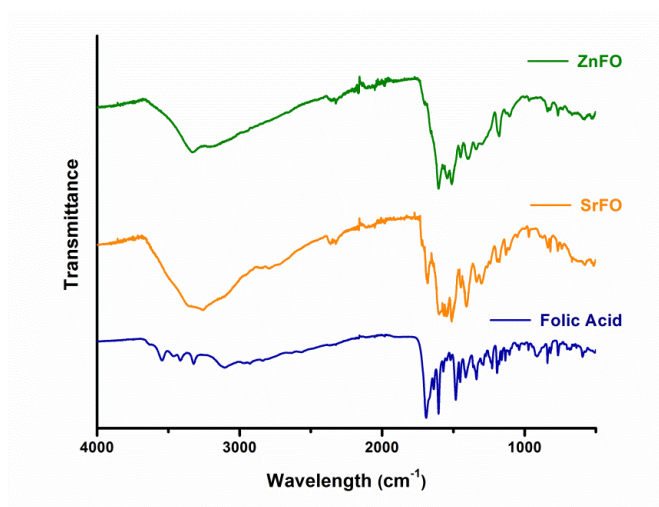

**Figure S1.** FTIR spectra of folic acid and metallic derivatives SrFO y ZnFO.

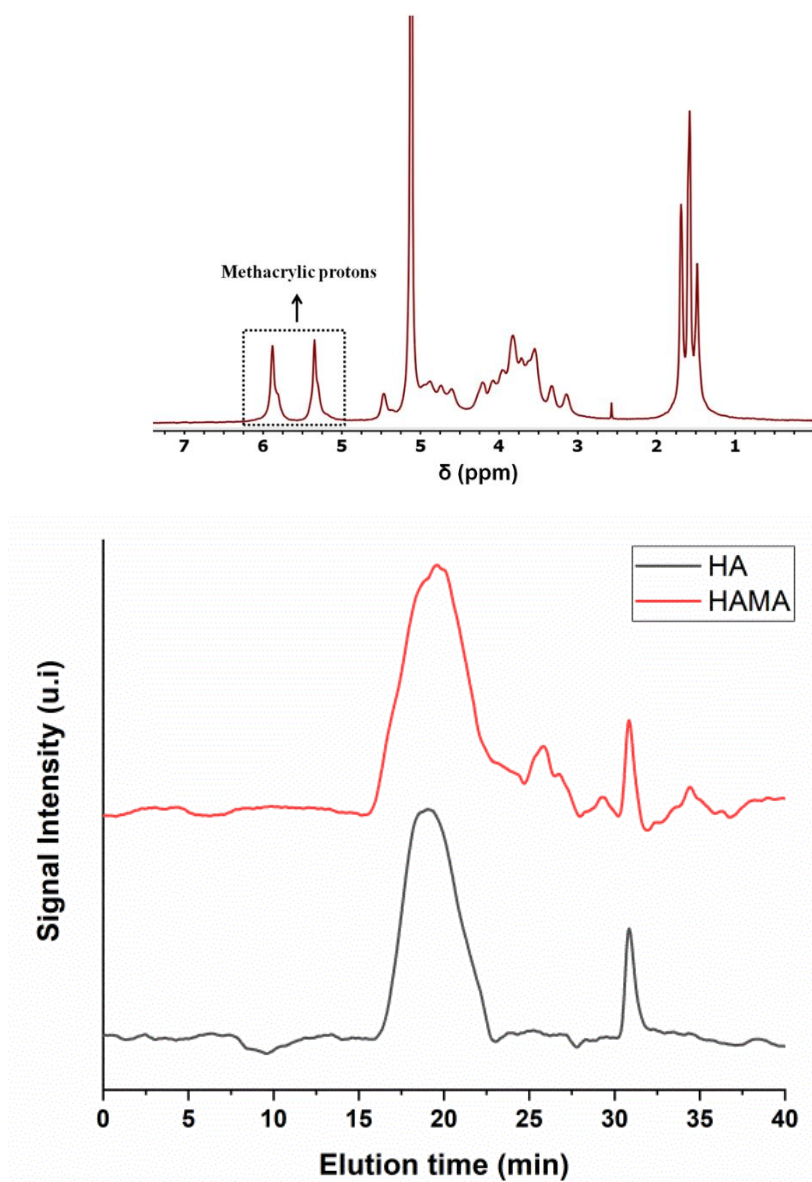

**Figure S2.** Upper:  $^1\text{H}$ -NMR spectra of methacrylated hyaluronic acid (HAMA), and Lower: Chromatogram obtained of unmodified hyaluronic acid (HA) and HAMA .

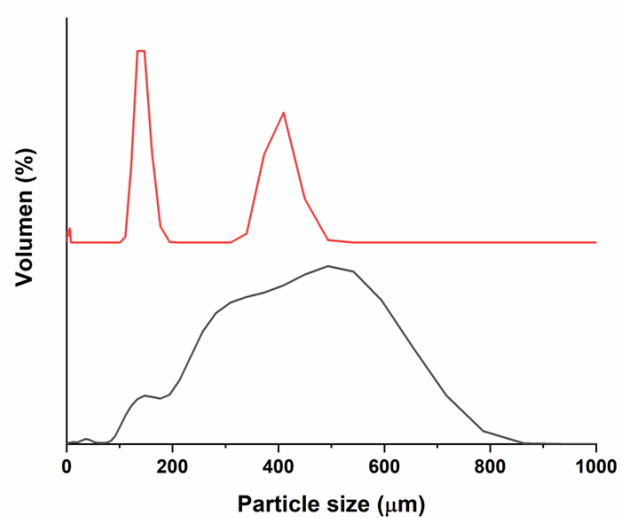

**Figure S3.** Particle size determination by Light scattering measurements of  $\beta$ -TCP before (grey line) and after (red line) grinder treatment.

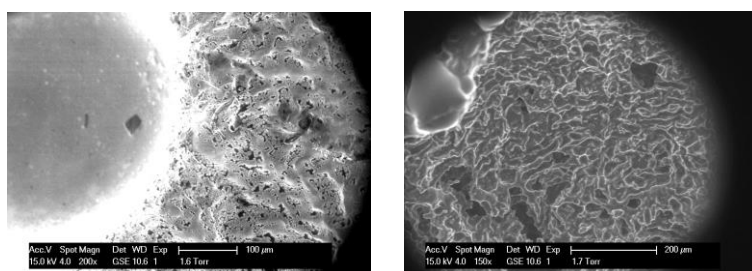

**Figure S4.** Animated gif (mounting of serial ESEM images obtained at different vapor pressure) representing swelling ability of top HAMA-hydrogel-based zone (Left) and bottom porous-PLGA-PEGDMA-based support (right) of biomimetic scaffold.

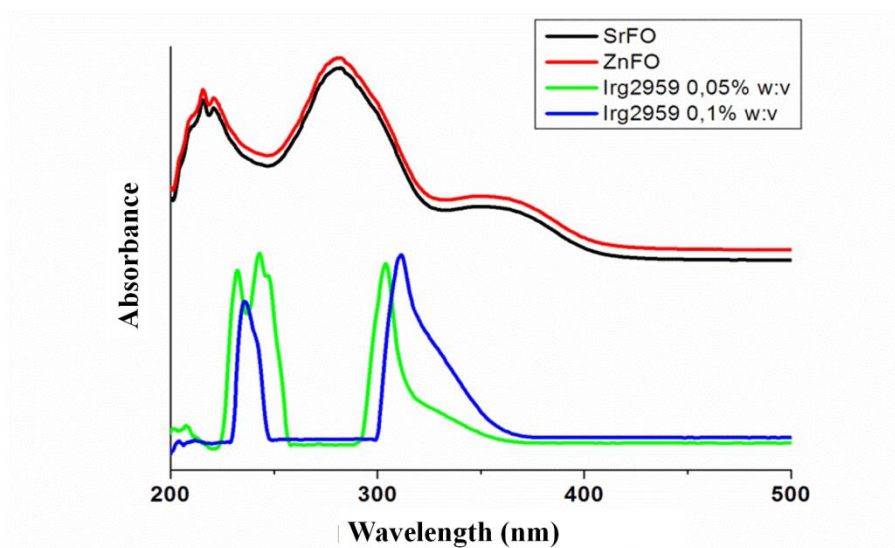

**Figure S5.** Absorbance spectra of ZnFO, SrFO and Irgacure2959 (at 0.05 % and 0.1 % w:v).
